# Supplementary material for: pH-Responsive non-ionic diblock copolymers: protonation of a morpholine end-group induces an order–order transition
Source: Royal Society of Chemistry journal article supplement (doi:10.1039/c5py01510c), 2015-10-13
Supplement: c5py01510c1.pdf [file c5py01510c1.pdf]

## Supporting Information

### pH-Responsive Non-ionic Diblock Copolymers: Protonation of a Morpholine End-group Induces an Order-Order transition

N. J. W. Penfold, J. R. Lovett, N. J. Warren, P. Verstraete<sup>b</sup>, J. Smets<sup>b</sup> and S. P. Armes<sup>a</sup>

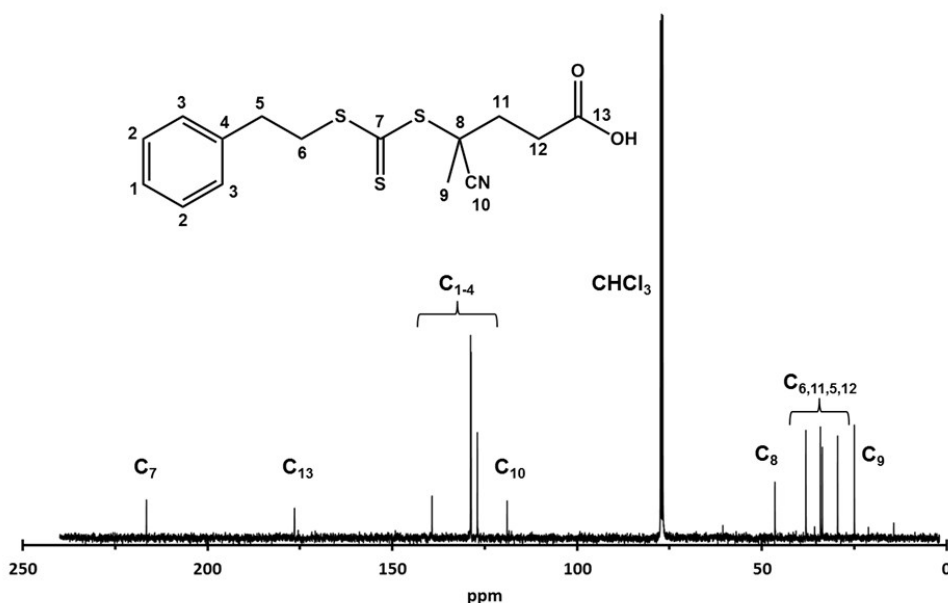

**Figure S1.** Assigned <sup>13</sup>C NMR spectrum obtained for PETTC RAFT agent in CDCl<sub>3</sub> at 298 K.

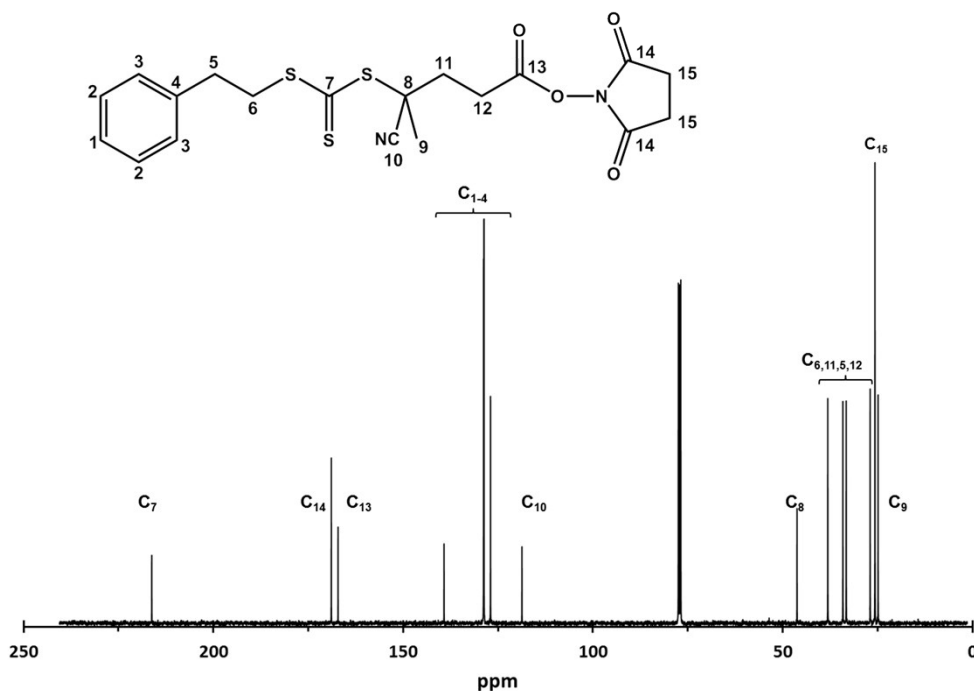

**Figure S2.** Assigned <sup>13</sup>C NMR spectrum obtained for SPETTC RAFT agent in CDCl<sub>3</sub> at 298 K.

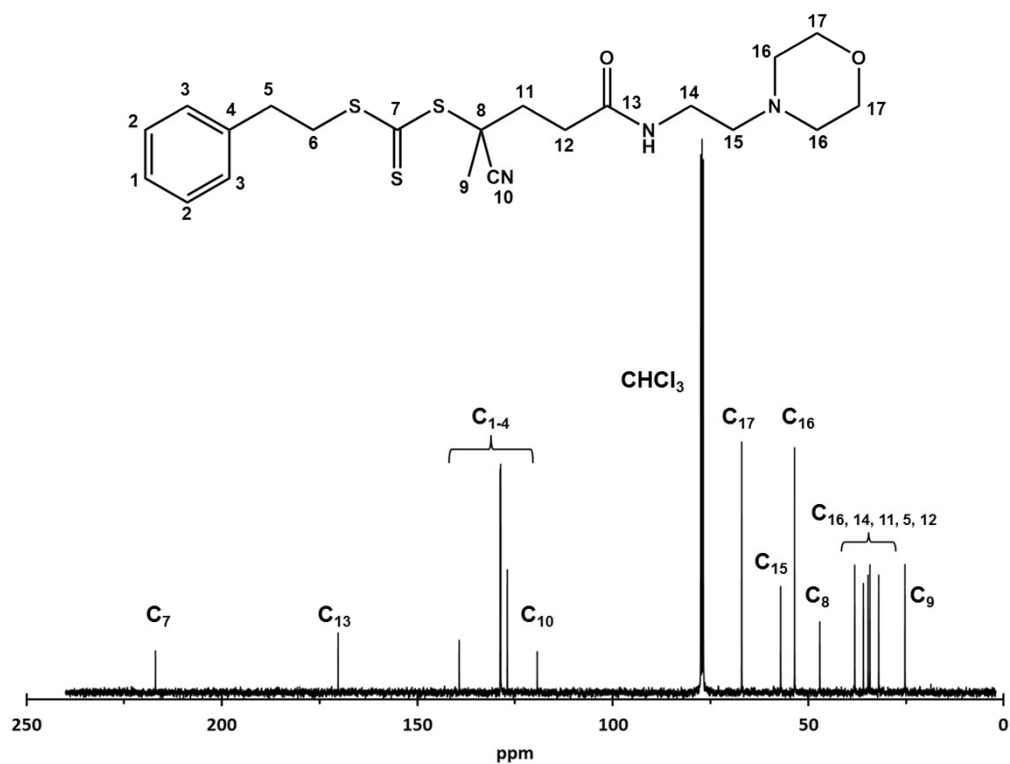

**Figure S3.** Assigned  $^{13}\text{C}$  NMR spectrum obtained for MPETTC RAFT agent in  $\text{CDCl}_3$  at 298 K.

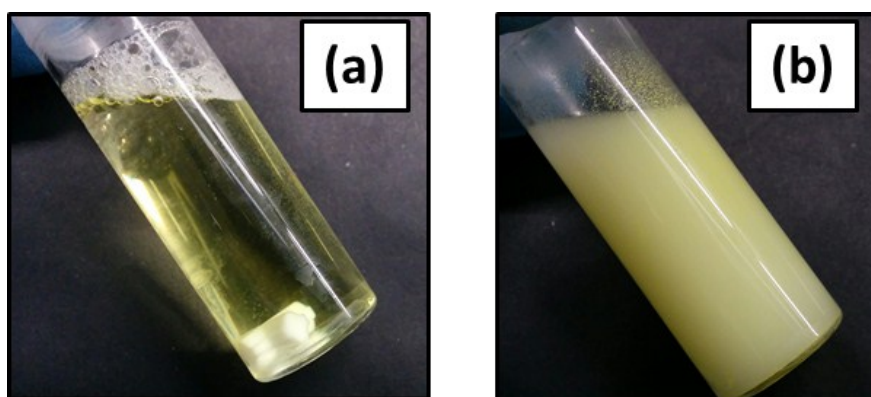

**Figure S4.** Digital images obtained for a 0.50% w/w MPETTC RAFT agent in water (a) at pH 4.5 where MPETTC is soluble due to morpholine end-group protonation and (b) at pH 7.5 where MPETTC is insoluble.

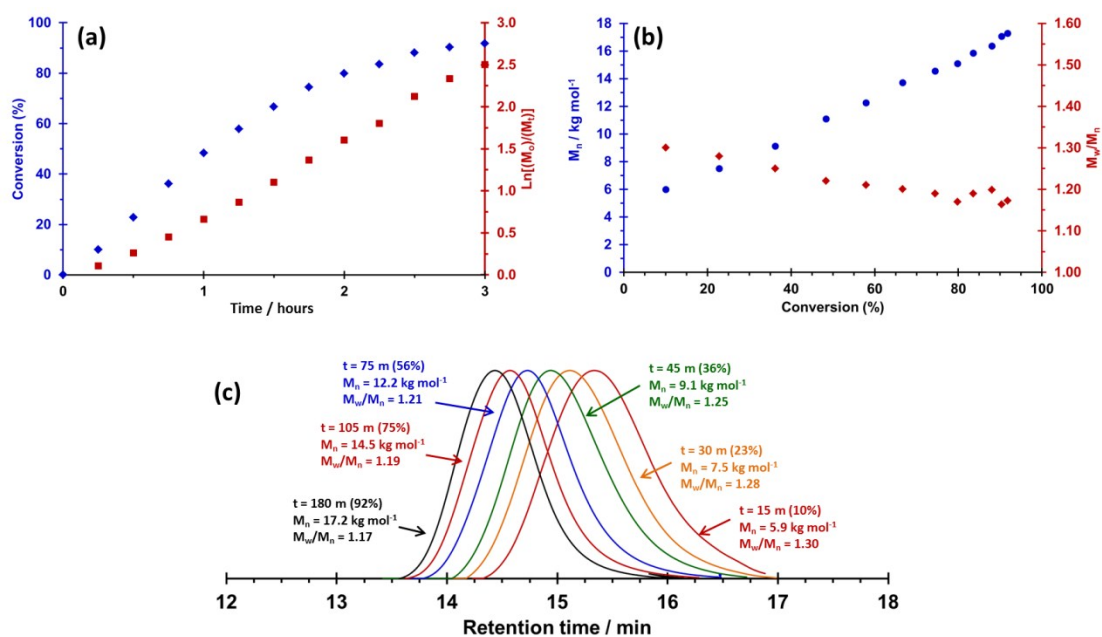

**Figure S5.** (a) Monomer conversion v. time curve, (b) evolution of number-average molecular weight ( $M_n$ ) with conversion and (c) selected unimodal DMF GPC chromatograms obtained for the RAFT solution polymerisation of glycerol monomethacrylate in water at 44 °C (25% solids, pH 2). A degree of polymerisation of 75 was targeted and  $[MPETTC]/[VA-044] = 5.0$ .  $M_w$  and  $M_n$  values were determined by DMF GPC calibrated with a series of near-monodisperse PMMA standards.

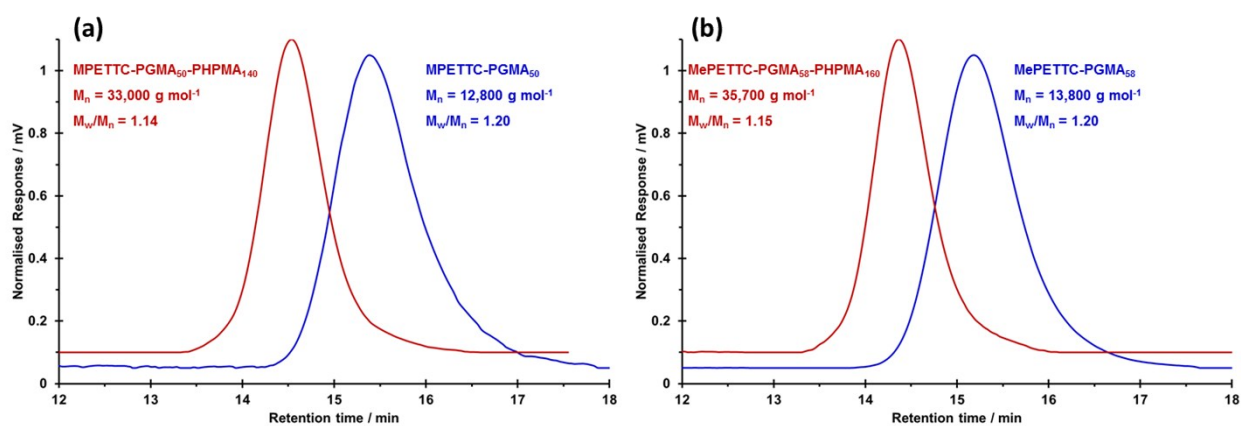

**Figure S6.** DMF GPC chromatograms obtained for (a) MPETTC-PGMA<sub>50</sub> macro-CTA and MPETTC-PGMA<sub>50</sub>-PPHMA<sub>140</sub> diblock copolymer and (b) MePETTC-PGMA<sub>58</sub> and MePETTC-PGMA<sub>58</sub>-PPHMA<sub>160</sub> diblock copolymer synthesised by RAFT aqueous dispersion polymerisation at pH 7.0 – 7.50. Number-averaged,  $M_n$ , and weight-averaged,  $M_w$ , molecular weights are relative to PMMA standards.

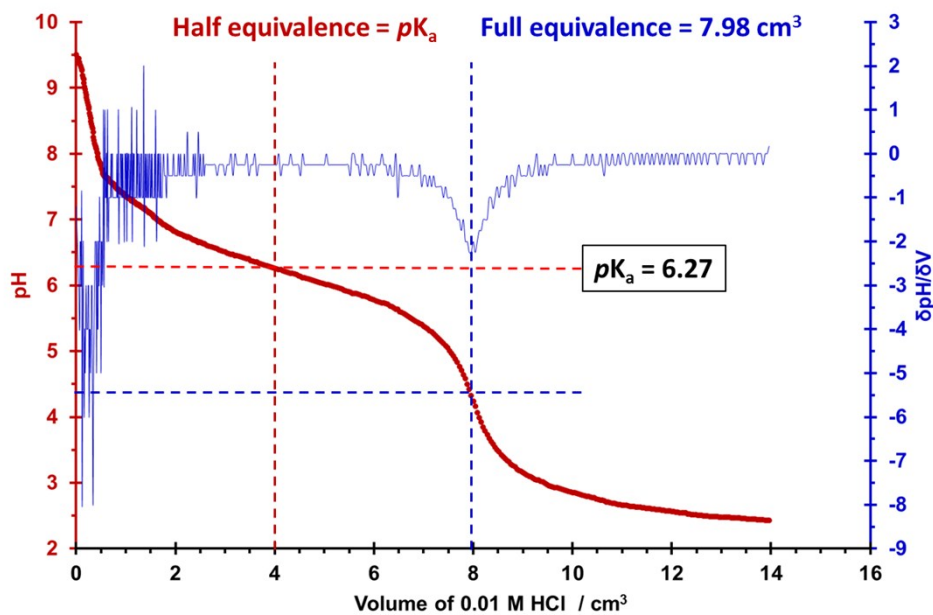

**Figure S7.** Acid titration curves to determine the  $pK_a$  of MPETTC-PGMA<sub>50</sub> macro-CTA in water to be 6.27.

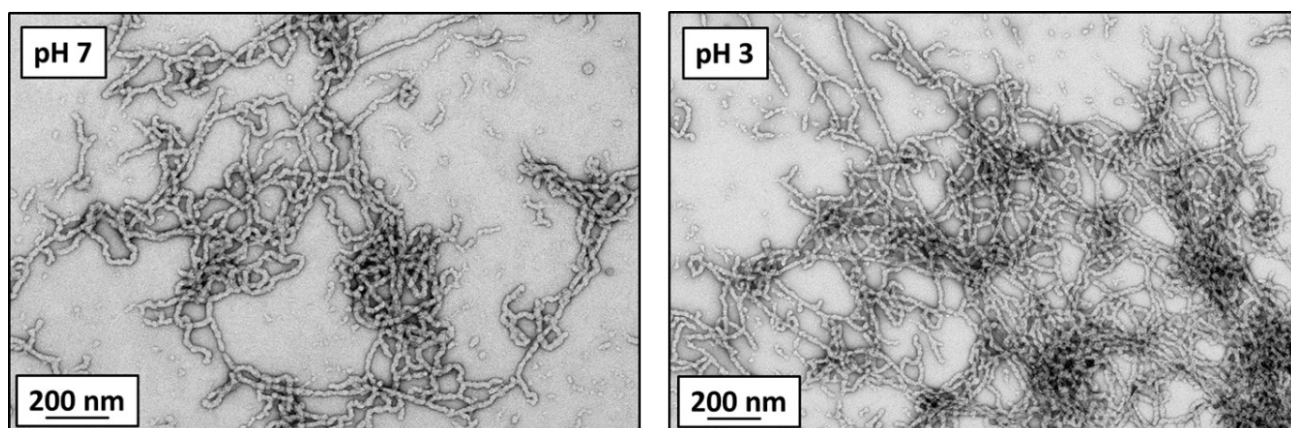

**Figure S8.** TEM images at pH 7 and pH 3 for MePETTC-PGMA<sub>58</sub>-PHPMA<sub>160</sub> diblock copolymer worms synthesised by RAFT aqueous dispersion polymerisation at pH 7.0 – 7.5. As a non-ionic end-group control, no change in worm-like morphology is observed upon a pH change, as expected.
